# Supplementary material for: Recycling and valorization of LDPE: direct transformation into highly ordered doped-carbon materials and their application as electro-catalysts for the oxygen reduction reaction
Source: Royal Society of Chemistry journal article supplement (doi:10.1039/d1cy02082j), 2021-12-16
Supplement: d1cy02082j1.pdf [file d1cy02082j1.pdf]

# Recycling and valorization of LDPE: direct transformation into highly ordered doped-carbons and its application as electro-catalyst for the oxygen reduction reaction

J. Castelo-Quibén\*†, E. Bailón-García\*, A.I. Moral-Rodríguez, F. Carrasco-Marín and A.F. Pérez-Cadenas.

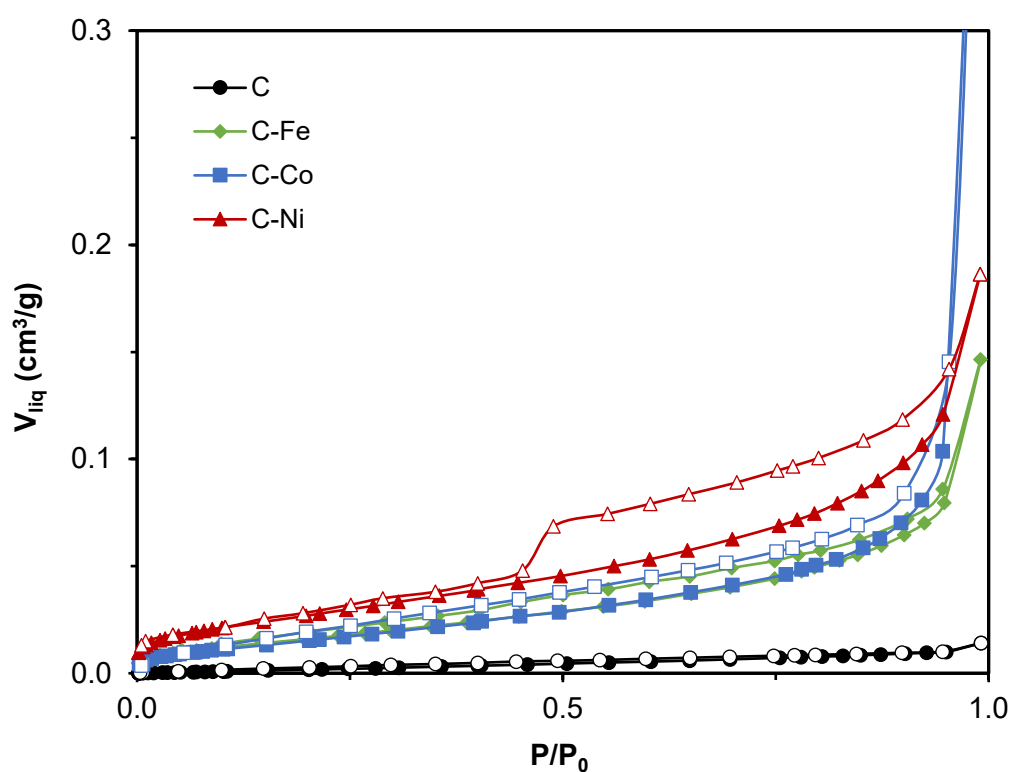

**Figure S1.** N<sub>2</sub> adsorption-desorption isotherms of samples.

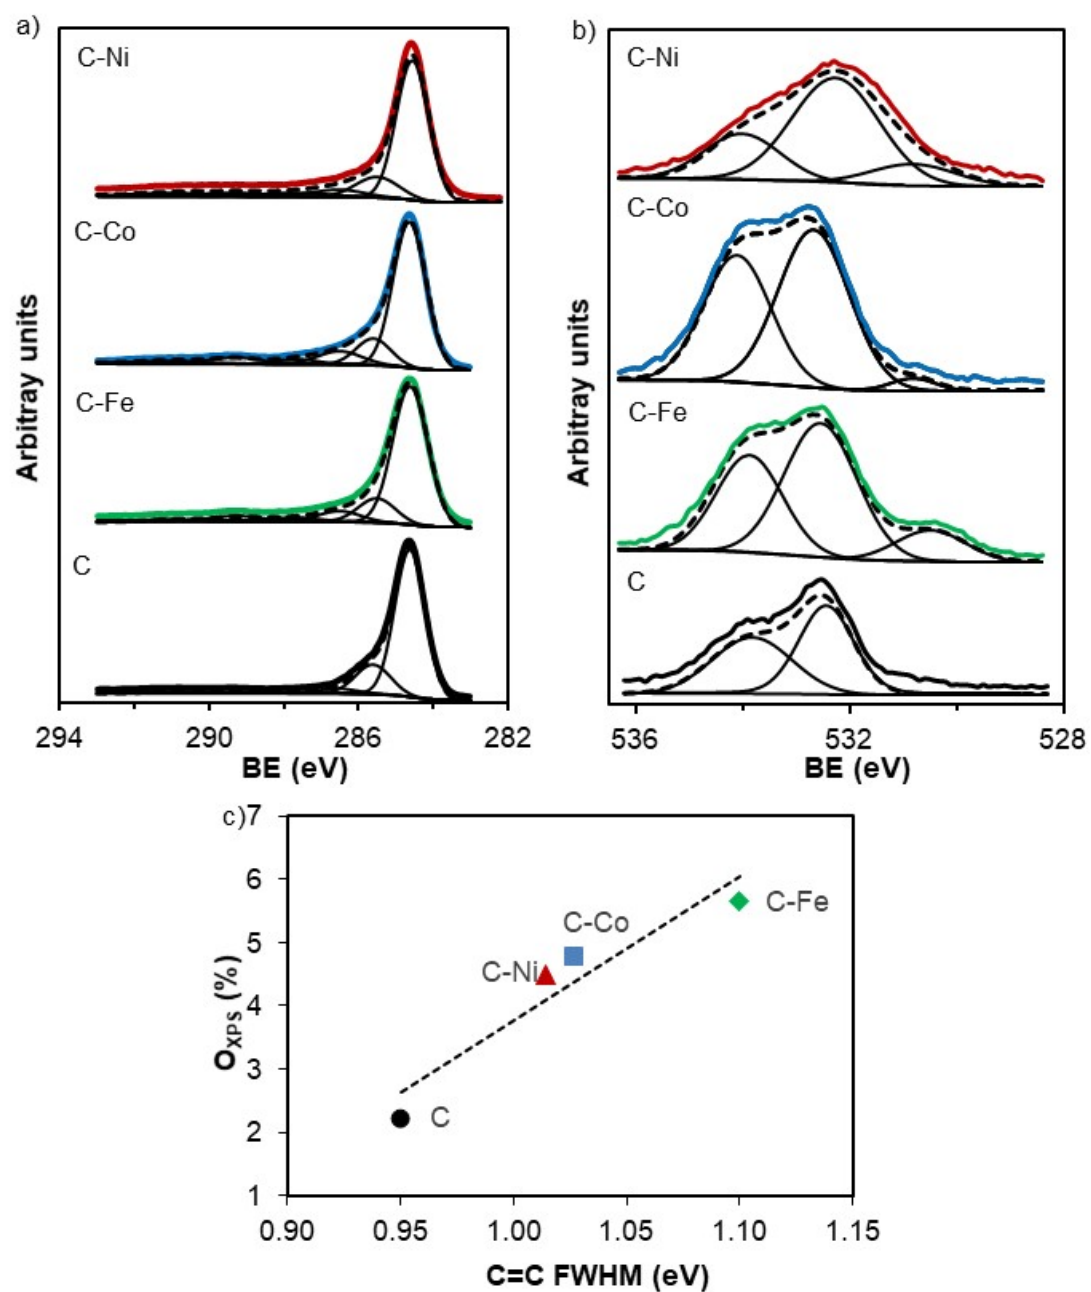

**Figure S2.** XP Spectra of a) C1s and b) O1s regions and c) correlation between FWHM (C=C) and the surface oxygen content.

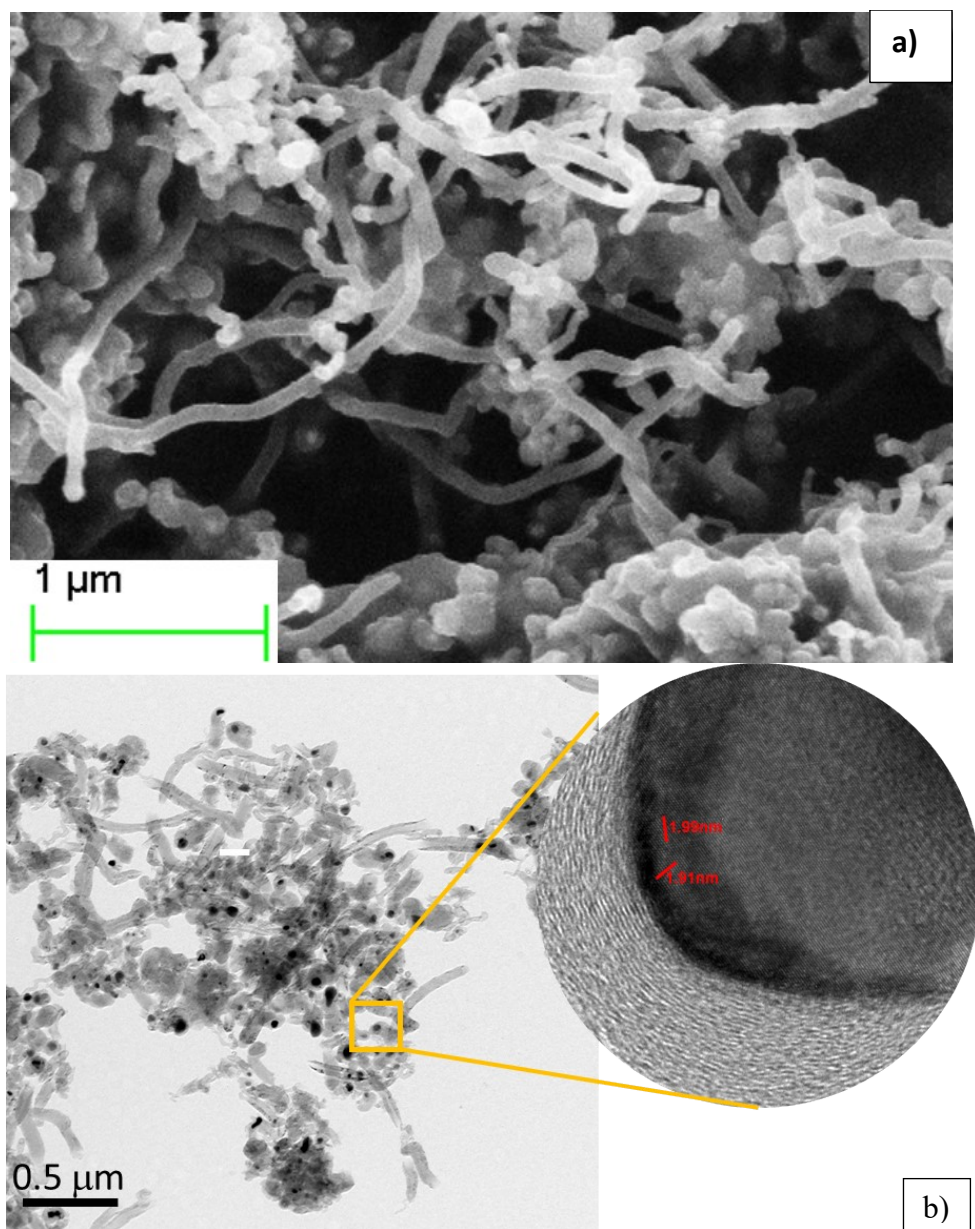

**Figure S3.** a) SEM and b) HRTEM images of C-Co samples after the catalytic test.
